# Supplementary material
Source: PubMed Central journal article supplement (PMC3777828)
Supplement: NIHMS509363-supplement-Figure_S1.pdf [file NIHMS509363-supplement-Figure_S1.pdf]

## SUPPLEMENTAL FIGURE

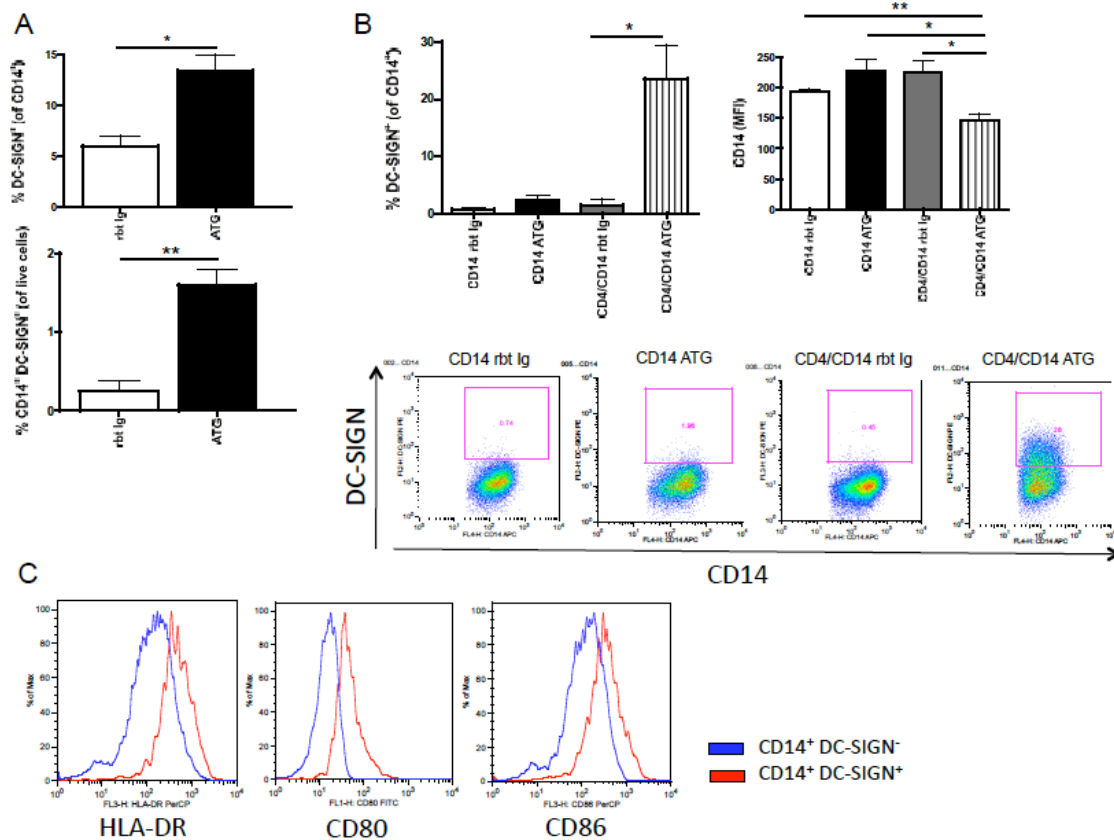

### Supplemental Figure 1. ATG induces CD14<sup>+</sup>DC-SIGN<sup>+</sup> monocyte-derived dendritic cells in the presence of CD4<sup>+</sup> T cells

A, Unselected PBMCs are cultured with rbtIg or ATG over 24 hours. ATG treatment induces the differentiation of CD14<sup>+</sup> monocytes into CD14<sup>+</sup>DC-SIGN<sup>+</sup> monocyte-derived dendritic cells. B, CD14<sup>+</sup> monocytes were cultured either separately or in combination with CD4<sup>+</sup> T cells (1:1), and treated with either rbt Ig or ATG for 24 hours. Significant generation of CD14<sup>+</sup>DC-SIGN<sup>+</sup> monocyte-derived dendritic cells only occurs in the presence of both CD4<sup>+</sup> T cells and ATG, which is accompanied by decreased expression of CD14.

C, Compared to CD14<sup>+</sup>DC-SIGN<sup>-</sup> monocytes, CD14<sup>+</sup>DC-SIGN<sup>+</sup> monocyte-derived dendritic cells show increased expression of HLA-DR, CD80, and CD86.

Data is representative of three independent experiments (n=3).

\*p<0.05; \*\*p<0.01
